# Supplementary material for: A highly sensitive and selective hepatitis B DNA biosensor using gold nanoparticle electrodeposition on an Au electrode and mercaptobenzaldehyde
Source: Royal Society of Chemistry journal article supplement (doi:10.1039/c4ay01465k), 2014-09-09
Supplement: c4ay01465k1.pdf [file c4ay01465k1.pdf]

### Determination of the surface coverage at the biosensor surface

The surface coverage of the modified electrodes were quantitatively measured by a previously reported procedure [43]. In this procedure, the electrostatic binding of the cationic redox active  $[\text{Ru}(\text{NH}_3)_6]^{3+}$  to the anionic DNA backbone was used to quantify the amount of probe DNA on the electrode by measuring the charge passed during the reduction of  $[\text{Ru}(\text{NH}_3)_6]^{3+}$  using chronocoulometry, first proposed by Tarlov and co-workers. It can be easily calculated from the following equations:

$$\Gamma_{\text{DNA}} = \Gamma_0 (z/m) (N_A) \quad (1)$$

$$\Gamma_0 = Q/(nFA) \quad (2)$$

where  $\Gamma_0$  is the surface density of  $[\text{Ru}(\text{NH}_3)_6]^{3+}$  ( $\text{mol cm}^{-2}$ ),  $\Gamma_{\text{DNA}}$  is the surface density of DNA ( $\text{mol cm}^{-2}$ ),  $n$  is the number of electrons in the reaction,  $A$  is the area of the working electrode ( $\text{cm}^2$ ),  $m$  is the number of nucleotides in the DNA,  $z$  is the charge of the redox molecule,  $F$  is Faraday constant ( $\text{C mol}^{-1}$ ), and  $N_A$  is Avogadro's number.  $Q$  is the charge which can be obtained either by integrating the redox peaks in the cyclic voltammograms or by calculating the chronocoulometric intercept at  $t = 0$ . The surface densities of probe DNA at the modified electrodes were obtained from the chronocoulometric curves of  $100 \text{ mmol L}^{-1} [\text{Ru}(\text{NH}_3)_6]^{3+}$  in  $10 \text{ mmol L}^{-1}$  phosphate buffer solution with pH 7.0 (Figure 1).

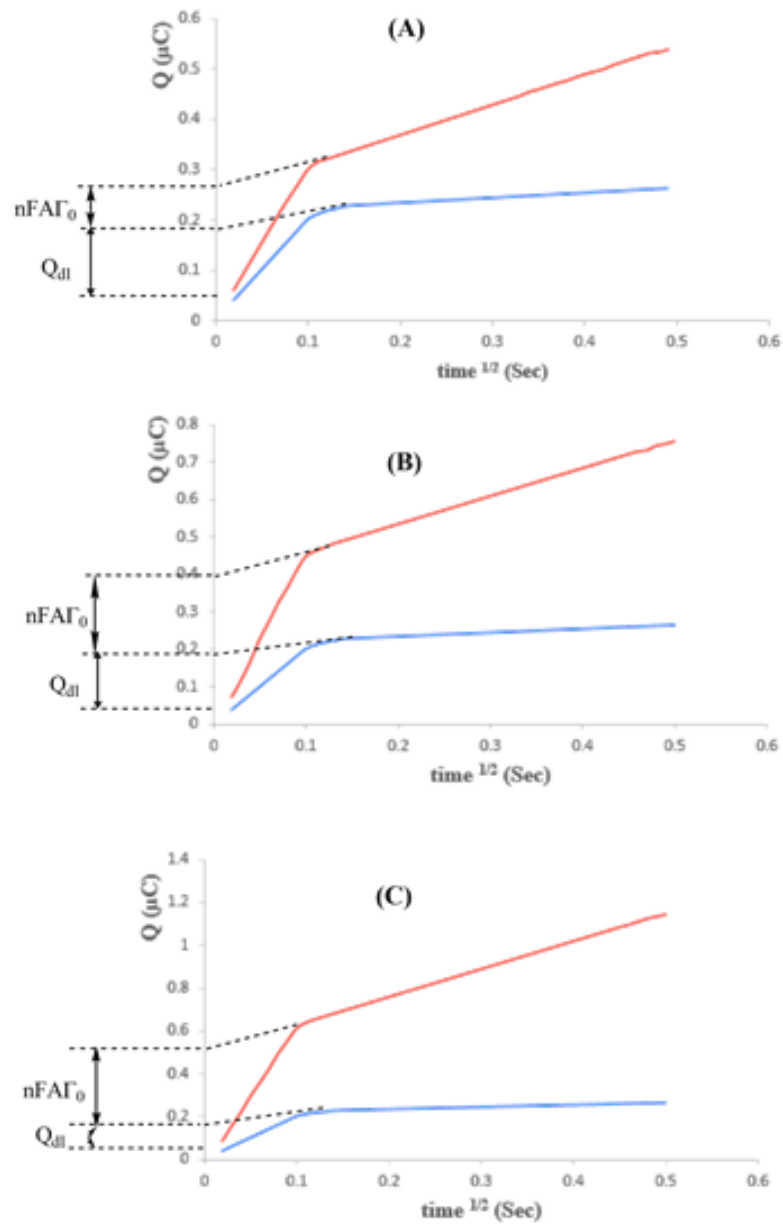

Figure 1. Chronocoulometric curves in the absence (lower curves) and presence (upper curves) of  $100 \text{ mmol L}^{-1} [\text{Ru}(\text{NH}_3)_6]^{3+}$  in  $10 \text{ mmol L}^{-1}$  phosphate buffer solution (pH 7.0) for electrodes modified with different surface densities of probe DNA. The probe concentrations were  $0.01$  (A),  $1$  (B), and  $5$  (C)  $\mu\text{mol L}^{-1}$ . The dashed lines represent the linear fit to the data for determination of the intercept at  $t = 0$ .
